# Supplementary material for: Approximate Resolution of Stochastic Choice-Based Discrete Planning
Source: Atypon-hosted journal article supplement (doi:10.1287/ijoc.2024.0694), 2025-03-10
Supplement: ijoc.2024.0694.cd.zip [file Online Appendix.pdf › 2024.0694-main/docs/Online Appendix.pdf]

# Online Appendix for "Approximate Resolution of Stochastic Choice-based Discrete Planning"

## A.1. Proofs

### A.1.1. Proof of Proposition 1

Given a feasible  $\bar{x} \in \Omega$ , define  $\mathcal{J}^o = \{j \in \mathcal{J} : \bar{x}_j = 1\}$  and  $j_i^* = \arg \max_{j' \in \mathcal{J}^o} u_{ij'}$ . An optimal primal solution  $\bar{y}$  to  $[\mathbf{SP}_i]$  can be easily obtained as

$$\bar{y}_{ij} = \begin{cases} 1, & j = j_i^* \\ 0, & \text{otherwise} \end{cases} \quad (\text{A.1})$$

Now, given  $\bar{x}$  and  $\bar{y}$ , the reduced KKT conditions without primal feasibility are

$$\bar{\nu}_{ij}(\bar{x}_j - \bar{y}_{ij}) = 0, \forall i \in \mathcal{I}, \forall j \in \mathcal{J}, \quad (\text{A.2})$$

$$\bar{\mu}_{ik}(1 - \bar{x}_k - \sum_{j \in \mathcal{J}: u_{ij} < u_{ik}} \bar{y}_{ij}) = 0, \forall i \in \mathcal{I}, \forall k \in \mathcal{J}, \quad (\text{A.3})$$

$$r_{ij} - \bar{\lambda}_i - \bar{\nu}_{ij} - \sum_{k \in \mathcal{J}: u_{ik} > u_{ij}} \bar{\mu}_{ik} \leq 0, \forall i \in \mathcal{I}, \forall j \in \mathcal{J}, \quad (\text{A.4})$$

$$\bar{\nu}_i, \bar{\mu}_i \geq 0. \quad (\text{A.5})$$

When  $j \in \mathcal{J}^o$ , we have  $\bar{\nu}_{ij}(\bar{x}_j - \bar{y}_{ij}) = 0$  since  $\bar{\nu}_{ij} = 0$ ; when  $j \in \mathcal{J} \setminus \mathcal{J}^o$ , we have  $\bar{\nu}_{ij}(\bar{x}_j - \bar{y}_{ij}) = 0$  since  $\bar{x}_j - \bar{y}_{ij} = 0$ . Therefore, (A.2) is satisfied.

When  $k = j_i^*$ , we have  $\bar{\mu}_{ik}(1 - \bar{x}_k - \sum_{j \in \mathcal{J}: u_{ij} < u_{ik}} \bar{y}_{ij}) = 0$  since  $1 - \bar{x}_{j_i^*} - \sum_{j \in \mathcal{J}: u_{ij} < u_{ik}} \bar{y}_{ij} = 1 - 1 - 0 = 0$ ; when  $k \in \mathcal{J} \setminus \{j_i^*\}$ , we have  $\bar{\mu}_{ik}(1 - \bar{x}_k - \sum_{j \in \mathcal{J}: u_{ij} < u_{ik}} \bar{y}_{ij}) = 0$  since  $\bar{\mu}_{ik} = 0$ . Therefore, (A.3) is satisfied.

When  $j = j_i^*$ , we have  $r_{ij} - \bar{\lambda}_i - \bar{\nu}_{ij} - \sum_{k \in \mathcal{J}: u_{ik} > u_{ij}} \bar{\mu}_{ik} = r_{ij_i^*} - r_{ij_i^*} - 0 - 0 = 0$ ; when  $j \in \mathcal{J}^o \setminus \{j_i^*\}$ , we have  $r_{ij} - \bar{\lambda}_i - \bar{\nu}_{ij} - \sum_{k \in \mathcal{J}: u_{ik} > u_{ij}} \bar{\mu}_{ik} = r_{ij} - \bar{\lambda}_i - [\max_{j' \in \mathcal{J}^o \setminus \{j_i^*\}} r_{ij'} - \bar{\lambda}_i]_+ \leq 0$ ; when  $j \in \mathcal{J} \setminus \mathcal{J}^o$ , we have  $r_{ij} - \bar{\lambda}_i - \bar{\nu}_{ij} - \sum_{k \in \mathcal{J}: u_{ik} > u_{ij}} \bar{\mu}_{ik} = r_{ij} - \bar{\lambda}_i - \sum_{k \in \mathcal{J}: u_{ik} > u_{ij}} \bar{\mu}_{ik} - [r_{ij} - \bar{\lambda}_i - \sum_{k \in \mathcal{J}: u_{ik} > u_{ij}} \bar{\mu}_{ik}]_+ \leq 0$ . Therefore, (A.4) is satisfied.

Finally, we check the dual and primal objectives, i.e.,  $\bar{\lambda}_i + \sum_{j \in \mathcal{J}} \bar{\nu}_{ij} \bar{x}_j + \sum_{k \in \mathcal{J}} \bar{\mu}_{ik}(1 - \bar{x}_k) = r_{ij_i^*} + \sum_{j \in \mathcal{J}^o} 0 \cdot 1 + \sum_{j \in \mathcal{J} \setminus \mathcal{J}^o} [r_{ij} - \bar{\lambda}_i - \sum_{k \in \mathcal{J}: u_{ik} > u_{ij}} \bar{\mu}_{ik}]_+ \cdot 0 + 0 \cdot (1 - 1) + \sum_{j \in \mathcal{J} \setminus \{j_i^*\}} 0 \cdot (1 - 0) = r_{ij_i^*} = \sum_{j \in \mathcal{J}} r_{ij} \bar{y}_{ij}$ . That is, the primal objective is equal to the dual objective. Altogether, we show that the proposed  $(\bar{\lambda}_i, \bar{\nu}_i, \bar{\mu}_i)$  is an optimal solution to  $[\mathbf{DSP}_i]$ .  $\square$

### A.1.2. Proof of Proposition 2

To start, Constraint (25c) can be written as

$$y_{ij} \leq x_j, \forall j \in \mathcal{J}, \quad (\text{A.6})$$

$$y_{ij} \leq 1 - \delta_{ijk} x_k, \forall j \in \mathcal{J}, \forall k \in \mathcal{J}. \quad (\text{A.7})$$

It suffices to show that Constraint (A.7) has the same effect as Constraint (15e). For any  $i \in \mathcal{I}, k \in \mathcal{J}$ , define set  $\mathcal{J}_i^k = \{j \in \mathcal{J} : U_{ij} < U_{ik}\}$ . Then Constraint (A.7) is equivalent to  $y_{ij} \leq 1 - x_k, \forall j \in \mathcal{J}_i^k$ . If option  $k$  is offered, then we have  $x_k = 1$  and  $y_{ij} = 0, \forall j \in \mathcal{J}_i^k$ , meaning that any option with lower utility than option  $k$  will not be chosen; if option  $k$  is not offered, then we have  $x_k = 0$  and  $y_{ij} \leq 1, \forall j \in \mathcal{J}_i^k$ , which is automatically satisfied. Therefore, Constraint (A.7) has the same effect as Constraint (15e) and  $[\mathbf{nSP}_i]$  is equivalent to  $[\mathbf{SP}_i]$ .  $\square$

### A.1.3. Proof of Proposition 3

Under each scenario  $i \in \mathcal{I}$ , define  $\mathcal{J}^c = \{j \in \mathcal{J} : \pi_j > \pi_{m_i^*}\}$ . Then we can construct  $\bar{y}$  as

$$\bar{y}_{ij} = \begin{cases} \bar{\beta}_{ij} & , \forall j \in \mathcal{J}^c, \\ 1 - \sum_{j \in \mathcal{J}^c} \bar{\beta}_{ij} & , j = j_i^*, \\ 0 & , \text{otherwise} \end{cases} \quad (\text{A.8})$$

The reduced KKT conditions without primal feasibility are

$$r_{ij} - \bar{\lambda}'_i - \bar{\eta}_{ij} \leq 0, \forall j \in \mathcal{J}, \quad (\text{A.9})$$

$$\bar{\eta}_{ij}(\bar{\beta}_{ij} - \bar{y}_{ij}) = 0, \forall j \in \mathcal{J}, \quad (\text{A.10})$$

$$\bar{\eta}_{ij} \geq 0, \forall j \in \mathcal{J}. \quad (\text{A.11})$$

We thus have  $\bar{\lambda}'_i + \bar{\eta}_{ij} = r_{i\pi_{m_i^*}} + [r_{ij} - r_{i\pi_{m_i^*}}]_+ \geq r_{ij}, \forall j \in \mathcal{J}$ . Therefore, (A.9) is satisfied.

When  $j \in \mathcal{J}^c$ , we have  $\bar{\eta}_{ij}(\bar{\beta}_{ij} - \bar{y}_{ij}) = 0$  since  $\bar{\beta}_{ij} - \bar{y}_{ij} = 0$ ; when  $j = \mathcal{J} \setminus \mathcal{J}^c$ , we have  $\bar{\eta}_{ij}(\bar{\beta}_{ij} - \bar{y}_{ij}) = 0$  since  $\bar{\eta}_{ij} = 0$ . Therefore, (A.10) is satisfied.

Finally, we check the primal and dual objectives:  $\bar{\lambda}'_i + \sum_{j \in \mathcal{J}} \bar{\eta}_{ij} \bar{\beta}_{ij} = \bar{\lambda}'_i + \sum_{j \in \mathcal{J}^c} \bar{\eta}_{ij} \bar{y}_{ij} + \sum_{j \in \mathcal{J} \setminus \mathcal{J}^c} \bar{\eta}_{ij} \bar{\beta}_{ij} = r_{i\pi_{m_i^*}} + \sum_{j \in \mathcal{J}^c} (r_{ij} - r_{i\pi_{m_i^*}}) \bar{y}_{ij} = r_{i\pi_{m_i^*}} (1 - \sum_{j \in \mathcal{J}^c} \bar{y}_{ij}) + \sum_{j \in \mathcal{J}^c} r_{ij} \bar{y}_{ij} = \sum_{j \in \mathcal{J}} r_{ij} \bar{y}_{ij}$ , which states that dual and primal objectives are equal. Altogether, we prove that the proposed  $(\bar{\lambda}'_i, \bar{\eta}_i)$  is an optimal solution to  $[\mathbf{nDSP}_i]$ .  $\square$

### A.1.4. Proof of Proposition 4

Let  $k_{ij}^* = \arg \min_{k \in \mathcal{J}} 1 - \delta_{ijk} \bar{x}_k$ . It directly follows from the definition of  $\beta, \bar{\nu}', \bar{\mu}'$  that

$$\theta_i \leq \bar{\lambda}'_i + \sum_{j \in \mathcal{J}} \bar{\eta}_{ij} \bar{\beta}_{ij} \quad (\text{A.13})$$

$$= \bar{\lambda}'_i + \sum_{j \in \mathcal{J}} \bar{\eta}_{ij} \left( \mathbb{I}\{\bar{\beta}_{ij} = \bar{x}_j\} \cdot x_j + \mathbb{I}\{\bar{\beta}_{ij} = 1 - \delta_{ijk_{ij}^*} \bar{x}_{k_{ij}^*}\} \cdot (1 - \delta_{ijk_{ij}^*} x_{k_{ij}^*}) \right) \quad (\text{A.14})$$

$$= \bar{\lambda}'_i + \sum_{j \in \mathcal{J}} \bar{\nu}'_{ij} x_j + \sum_{j \in \mathcal{J}} \bar{\mu}'_{ijk_{ij}^*} (1 - \delta_{ijk_{ij}^*} x_{k_{ij}^*}) \quad (\text{A.15})$$

$$= \bar{\lambda}'_i + \sum_{j \in \mathcal{J}} \bar{\nu}'_{ij} x_j + \sum_{j \in \mathcal{J}} \sum_{k \in \mathcal{J}} \bar{\mu}'_{ijk} (1 - \delta_{ijk} x_k) \quad (\text{A.16})$$

$$= \bar{\lambda}'_i + \sum_{j \in \mathcal{J}} \sum_{k \in \mathcal{J}} \bar{\mu}'_{ijk} + \sum_{j \in \mathcal{J}} (\bar{\nu}'_{ij} - \sum_{k \in \mathcal{J}} \delta_{ijk} \bar{\mu}'_{ijk}) x_j \quad (\text{A.17})$$

Equalities (A.15) and (A.16) comes from the fact that  $\bar{\mu}'_{ijk} = 0, \forall k \neq k_{ij}^*, \forall i \in \mathcal{I}, \forall j \in \mathcal{J}$ .  $\square$

## A.2. Solution quality test

This section provides solution quality results on three applications. We also compare Monte Carlo Sampling (MCS) and Latin Hypercube Sampling (LHS).

### A.2.1. Results of CAOP under multinomial probit model

We apply our SBBD on the multinomial probit model, which does not have closed-form formulation of the choice probability. Here, the utility of an alternative  $j \in \mathcal{J}$  is given by  $U_j = V_j + \xi_j$ , where  $V_j$  a deterministic component and  $\xi_j$  follow some i.i.d. normal distribution. We generate the problem instances as follow: both the deterministic utility  $V_j$  and reward  $R_j$  is generated from a uniform distribution on the interval  $[0,100]$  (with  $R_0 = 0$ ). The random utility  $\xi$  follows normal distribution with mean 0 and variance 100.

We use the estimated gaps  $\Delta$  and  $\Delta_{0.95}$  to assess the solution quality. Table A.1 reports the results. Obviously, LHS reduces both the variance  $\sigma$  and gaps compared with MCS. Moreover, when  $N = 1000$ , our SBBD supported by LHS is able to obtain small  $\Delta$  values and thus proven high-quality solution.

**Table A.1 Solution validation for CAOP under multinomial probit model.**

| $N$  | $ \mathcal{A} $ | $\tau$ | MCS       |               |          |          |                 | LHS       |               |          |          |                 |
|------|-----------------|--------|-----------|---------------|----------|----------|-----------------|-----------|---------------|----------|----------|-----------------|
|      |                 |        | $\hat{v}$ | $\bar{v}_N^M$ | $\sigma$ | $\Delta$ | $\Delta_{0.95}$ | $\hat{v}$ | $\bar{v}_N^M$ | $\sigma$ | $\Delta$ | $\Delta_{0.95}$ |
| 300  | 100             | 10     | 82.48     | 83.88         | 0.3853   | 1.70     | 2.47            | 82.45     | 83.39         | 0.2863   | 1.14     | 1.71            |
| 500  | 100             | 10     | 82.77     | 83.83         | 0.4011   | 1.28     | 2.08            | 82.74     | 83.16         | 0.2626   | 0.51     | 1.03            |
| 1000 | 100             | 10     | 82.95     | 83.26         | 0.4966   | 0.37     | 1.36            | 82.83     | 83.05         | 0.0943   | 0.27     | 0.45            |
| 300  | 200             | 10     | 86.57     | 88.12         | 0.4224   | 1.79     | 2.60            | 86.83     | 88.10         | 0.4275   | 1.46     | 2.27            |
| 500  | 200             | 10     | 87.03     | 88.35         | 0.4407   | 1.52     | 2.35            | 87.14     | 87.97         | 0.4138   | 0.95     | 1.74            |
| 1000 | 200             | 10     | 87.45     | 88.33         | 0.5272   | 1.01     | 2.00            | 87.52     | 87.89         | 0.3809   | 0.42     | 1.14            |

### A.2.2. Results of FLoP and MSMFLP

This section provides complete results of solution quality test for FLoP and MSMFLP. The dataset is the same as Section 5 in the main text. Tables A.2 and A.3 report the estimated gaps. Obviously, LHS significantly reduces the variance of objective as well as the approximation error compared with MCS. Moreover, for LHS, we include the change of  $\Delta$  and  $\Delta_{0.95}$  when problem size (i.e.,  $|\mathcal{A}|$  and  $|\mathcal{J}|$ ) increases in the parenthesis. For example, given  $N = 300$  and  $\tau = 5$ ,  $\Delta$  increases from 0.83% to 1.79% when  $|\mathcal{A}|$  increases from 10 to 20. Therefore, we put  $1.79 - 0.83 = 0.96$  in the parenthesis. Overall, we observe only slight increase of  $\Delta$  and  $\Delta_{0.95}$  for both FLoP (less than 1%) and MSMFLP (less than 0.4%).

## A.3. Efficiency test on CAOP under multinomial probit model

This section provides additional efficiency test results on CAOP under multinomial probit model. The utility of an alternative  $a \in \mathcal{A}$  is  $U_a = V_a + \xi_a$ . Both  $V_a$  and  $R_a$  are generated from  $\mathcal{U}[0, 100]$ ,  $\forall a \in \mathcal{A}$ . We then set  $V_0 = 50$  and  $R_0 = 0$ . The random term  $\xi_j$  follows i.i.d. normal distribution with mean 0 and variance  $\mathcal{V}$ . We employ the same stabilization procedure in Stage 1 as the exponential choice model in Section 5.1 of the main text.

**Table A.2 Solution validation for FLoP.**

| $N$  | $ \mathcal{A} $ | $\tau$ | MCS       |               |          |          |                 | LHS       |               |          |             |                 |
|------|-----------------|--------|-----------|---------------|----------|----------|-----------------|-----------|---------------|----------|-------------|-----------------|
|      |                 |        | $\hat{v}$ | $\bar{v}_N^M$ | $\sigma$ | $\Delta$ | $\Delta_{0.95}$ | $\hat{v}$ | $\bar{v}_N^M$ | $\sigma$ | $\Delta$    | $\Delta_{0.95}$ |
| 300  | 10              | 5      | 3.79      | 3.90          | 1.7146   | 2.92     | 3.66            | 3.79      | 3.82          | 0.5632   | 0.83        | 1.08            |
| 500  | 10              | 5      | 3.79      | 3.86          | 1.2640   | 1.94     | 2.49            | 3.79      | 3.81          | 0.4640   | 0.67        | 0.87            |
| 1000 | 10              | 5      | 3.79      | 3.82          | 0.7711   | 0.77     | 1.11            | 3.79      | 3.80          | 0.3453   | 0.18        | 0.33            |
| 300  | 20              | 5      | 3.91      | 4.09          | 1.4531   | 4.61     | 5.22            | 3.93      | 4.00          | 0.4413   | 1.79(+0.96) | 1.97(+0.89)     |
| 500  | 20              | 5      | 3.93      | 4.03          | 1.1287   | 2.48     | 2.96            | 3.93      | 3.98          | 0.4116   | 1.18(+0.51) | 1.35(+0.48)     |
| 1000 | 20              | 5      | 3.93      | 3.99          | 0.7212   | 1.37     | 1.68            | 3.93      | 3.95          | 0.3280   | 0.43(+0.25) | 0.57(+0.24)     |

**Table A.3 Solution validation for MSMFLP.**

| $N$  | $ \mathcal{J} $ | $\tau$ | MCS       |               |          |          |                 | LHS       |               |          |             |                 |
|------|-----------------|--------|-----------|---------------|----------|----------|-----------------|-----------|---------------|----------|-------------|-----------------|
|      |                 |        | $\hat{v}$ | $\bar{v}_N^M$ | $\sigma$ | $\Delta$ | $\Delta_{0.95}$ | $\hat{v}$ | $\bar{v}_N^M$ | $\sigma$ | $\Delta$    | $\Delta_{0.95}$ |
| 300  | 100             | 20     | 38.18     | 41.29         | 0.2214   | 8.15     | 9.10            | 39.26     | 39.86         | 0.0854   | 1.53        | 1.89            |
| 500  | 100             | 20     | 38.83     | 39.42         | 0.1636   | 6.15     | 6.85            | 39.42     | 39.77         | 0.0513   | 0.89        | 1.10            |
| 1000 | 100             | 20     | 39.24     | 40.35         | 0.1252   | 2.82     | 3.35            | 39.46     | 39.61         | 0.0336   | 0.38        | 0.52            |
| 300  | 200             | 20     | 38.80     | 42.24         | 0.2424   | 8.87     | 9.90            | 40.12     | 40.85         | 0.0892   | 1.82(+0.29) | 2.19(+0.30)     |
| 500  | 200             | 20     | 39.33     | 41.89         | 0.1857   | 6.51     | 7.29            | 40.19     | 40.63         | 0.0566   | 1.10(+0.21) | 1.33(+0.23)     |
| 1000 | 200             | 20     | 39.76     | 41.69         | 0.1184   | 4.84     | 5.53            | 40.23     | 40.53         | 0.0327   | 0.74(+0.36) | 0.87(+0.35)     |

Table A.4 reports the computational result. Apparently, SBBD outperforms BIBC by a large margin. Moreover, compared to MILP, SBBD is faster for all the 24 instances. Particularly, the superiority of SBBD becomes even more significant for the eight “hard” instances with  $N = 1000$ .

**Table A.4 Efficiency test on CAOP under multinomial probit model**

| $N$ | $ \mathcal{J} $ | $\tau$ | $\nu$ | SBBD |      |       |         |         | MILP  |    |         |         | BIBC   |       |      |         |         |
|-----|-----------------|--------|-------|------|------|-------|---------|---------|-------|----|---------|---------|--------|-------|------|---------|---------|
|     |                 |        |       | t[s] | #N   | #C    | rgap[%] | ogap[%] | t[s]  | #N | rgap[%] | ogap[%] | t[s]   | #N    | #C   | rgap[%] | ogap[%] |
| 300 | 100             | 10     | 100   | 6.2  | 85   | 10666 | 0.28    | 0.00    | 7.4   | 1  | 0.00    | 0.00    | 142.4  | 3984  | 2513 | 3.80    | 0.00    |
|     |                 |        | 200   | 4.7  | 38   | 8015  | 0.38    | 0.00    | 10.0  | 1  | 0.00    | 0.00    | 145.1  | 4329  | 2184 | 3.49    | 0.00    |
|     |                 |        | 500   | 5.0  | 1    | 9092  | 0.00    | 0.00    | 6.7   | 1  | 0.00    | 0.00    | 727.3  | 30937 | 2266 | 5.47    | 0.00    |
|     |                 | 200    | 100   | 5.0  | 11   | 8929  | 0.07    | 0.00    | 6.9   | 1  | 0.00    | 0.00    | 2411.0 | 57162 | 2159 | 5.14    | 0.00    |
|     |                 |        | 200   | 14.4 | 1266 | 15554 | 1.39    | 0.00    | 43.1  | 24 | 0.92    | 0.00    | 498.4  | 10274 | 3230 | 2.92    | 0.00    |
|     |                 |        | 500   | 10.9 | 550  | 11090 | 1.06    | 0.00    | 44.4  | 49 | 0.73    | 0.00    | 214.3  | 4921  | 3126 | 2.01    | 0.00    |
|     | 200             | 100    | 100   | 10.7 | 304  | 10885 | 0.63    | 0.00    | 63.8  | 9  | 0.36    | 0.00    | 3600.0 | 39168 | 3576 | 3.73    | 1.45    |
|     |                 |        | 200   | 9.8  | 171  | 11357 | 0.50    | 0.00    | 64.9  | 7  | 0.22    | 0.00    | 3600.0 | 31076 | 3694 | 3.01    | 1.14    |
|     |                 |        | 500   | 10.2 | 1    | 23464 | 0.00    | 0.00    | 10.0  | 1  | 0.00    | 0.00    | 443.6  | 5196  | 4564 | 4.41    | 0.00    |
|     |                 | 200    | 100   | 8.3  | 203  | 12840 | 0.70    | 0.00    | 11.9  | 1  | 0.00    | 0.00    | 195.0  | 4322  | 3602 | 2.94    | 0.00    |
|     |                 |        | 200   | 4.7  | 1    | 7630  | 0.00    | 0.00    | 10.0  | 1  | 0.00    | 0.00    | 3600.0 | 32683 | 3860 | 5.79    | 0.52    |
|     |                 |        | 500   | 7.4  | 19   | 10769 | 0.25    | 0.00    | 10.1  | 1  | 0.00    | 0.00    | 3600.0 | 23834 | 3763 | 5.33    | 0.98    |
| 500 | 100             | 100    | 100   | 21.6 | 732  | 22384 | 1.16    | 0.00    | 106.7 | 36 | 0.59    | 0.00    | 1338.5 | 7818  | 4025 | 3.20    | 0.00    |
|     |                 |        | 200   | 27.6 | 1125 | 24099 | 1.27    | 0.00    | 141.9 | 29 | 0.59    | 0.00    | 3600.0 | 18919 | 4751 | 3.95    | 0.87    |
|     |                 |        | 500   | 23.0 | 538  | 22674 | 0.54    | 0.00    | 131.4 | 1  | 0.00    | 0.00    | 3600.0 | 10352 | 5187 | 2.39    | 0.69    |
|     |                 | 200    | 100   | 22.5 | 446  | 22393 | 0.41    | 0.00    | 107.2 | 15 | 0.55    | 0.00    | 3600.0 | 9691  | 4999 | 3.08    | 1.58    |
|     |                 |        | 200   | 22.9 | 124  | 41533 | 0.38    | 0.00    | 49.1  | 1  | 0.00    | 0.00    | 1554.1 | 2742  | 7234 | 3.85    | 0.00    |
|     |                 |        | 500   | 29.4 | 501  | 41781 | 0.81    | 0.00    | 44.0  | 1  | 0.00    | 0.00    | 2001.9 | 4447  | 9963 | 3.76    | 0.00    |
|     | 200             | 100    | 100   | 17.4 | 1    | 26118 | 0.00    | 0.00    | 51.4  | 1  | 0.00    | 0.00    | 3600.0 | 5284  | 7544 | 5.39    | 2.46    |
|     |                 |        | 200   | 15.2 | 1    | 23568 | 0.00    | 0.00    | 52.0  | 1  | 0.00    | 0.00    | 3600.0 | 3726  | 6800 | 5.36    | 2.68    |
|     |                 |        | 500   | 59.5 | 1285 | 33294 | 1.91    | 0.00    | 228.3 | 15 | 0.89    | 0.00    | 3600.0 | 2982  | 8859 | 2.44    | 0.87    |
|     |                 | 200    | 100   | 83.7 | 1515 | 31773 | 1.95    | 0.00    | 341.8 | 67 | 1.21    | 0.00    | 3600.0 | 2855  | 8539 | 2.76    | 1.44    |
|     |                 |        | 200   | 52.4 | 687  | 50238 | 0.52    | 0.00    | 293.4 | 18 | 0.77    | 0.00    | 3600.0 | 2225  | 9867 | 3.10    | 2.62    |
|     |                 |        | 500   | 60.3 | 537  | 58418 | 0.59    | 0.00    | 336.5 | 47 | 0.98    | 0.00    | 3600.0 | 1649  | 9902 | 2.93    | 2.43    |
