# Supplementary figures and images for: Approximate Resolution of Stochastic Choice-Based Discrete Planning
Source: Atypon-hosted journal article supplement (doi:10.1287/ijoc.2024.0694), 2025-03-10

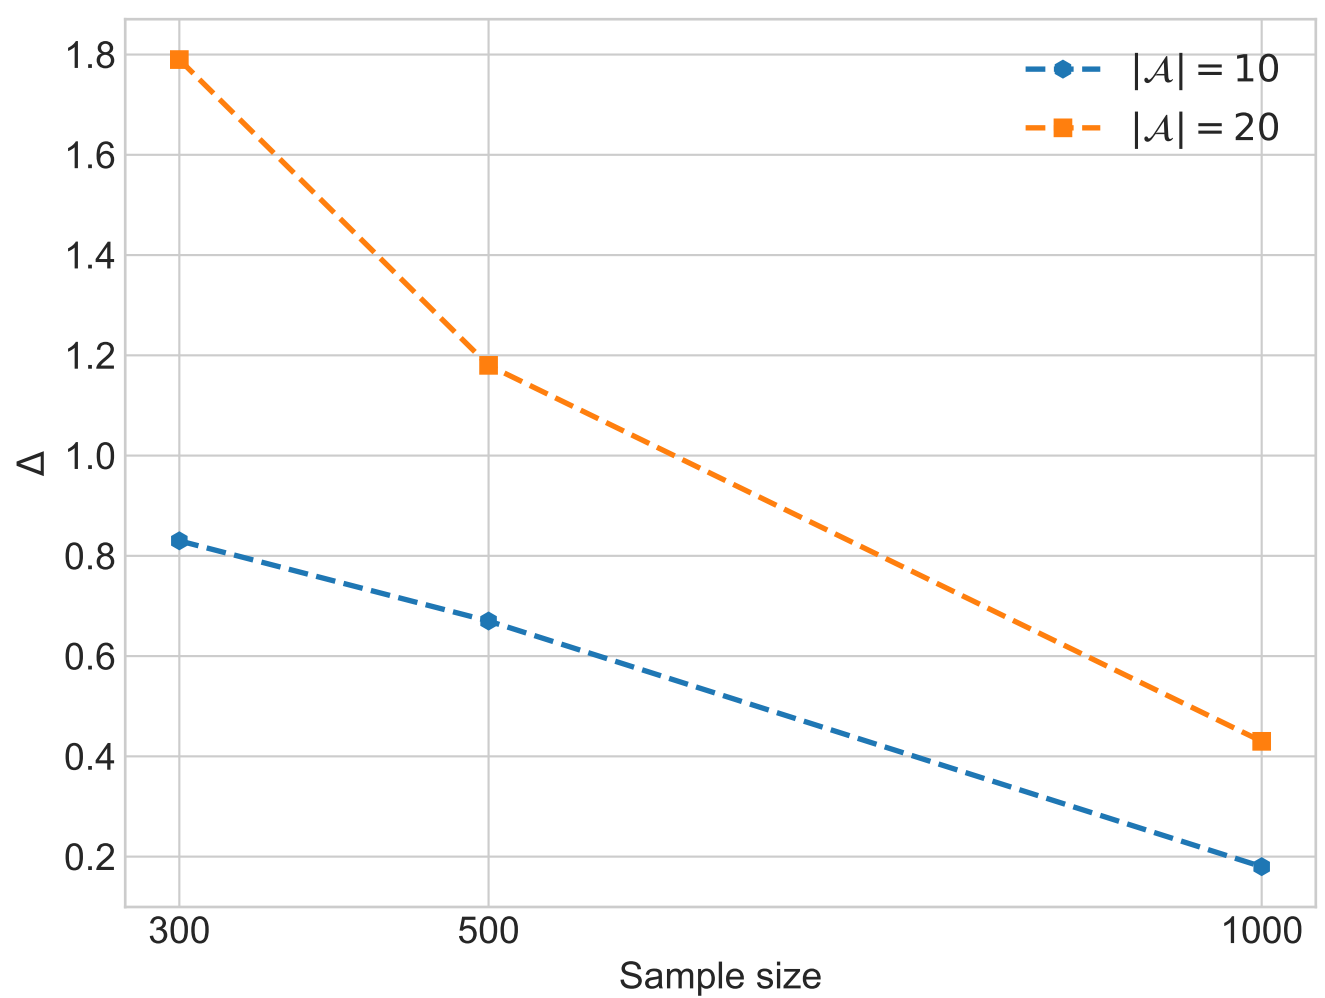

Supplement: ijoc.2024.0694.cd.zip [file app2-D2.pdf › 2024.0694-main/results/app2-D2.pdf]

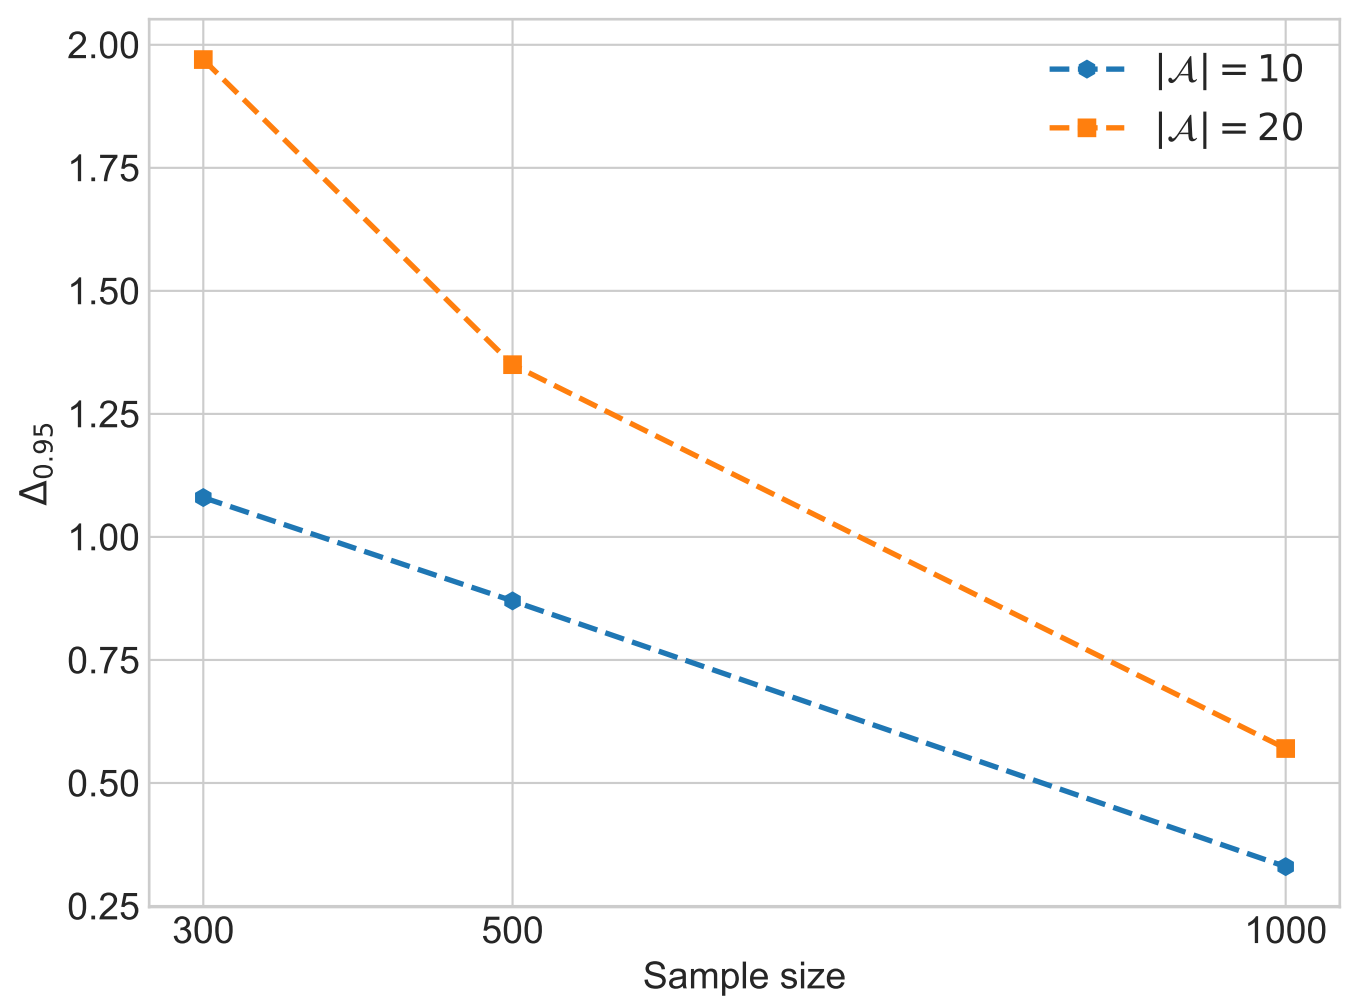

Supplement: ijoc.2024.0694.cd.zip [file app2-Da2.pdf › 2024.0694-main/results/app2-Da2.pdf]

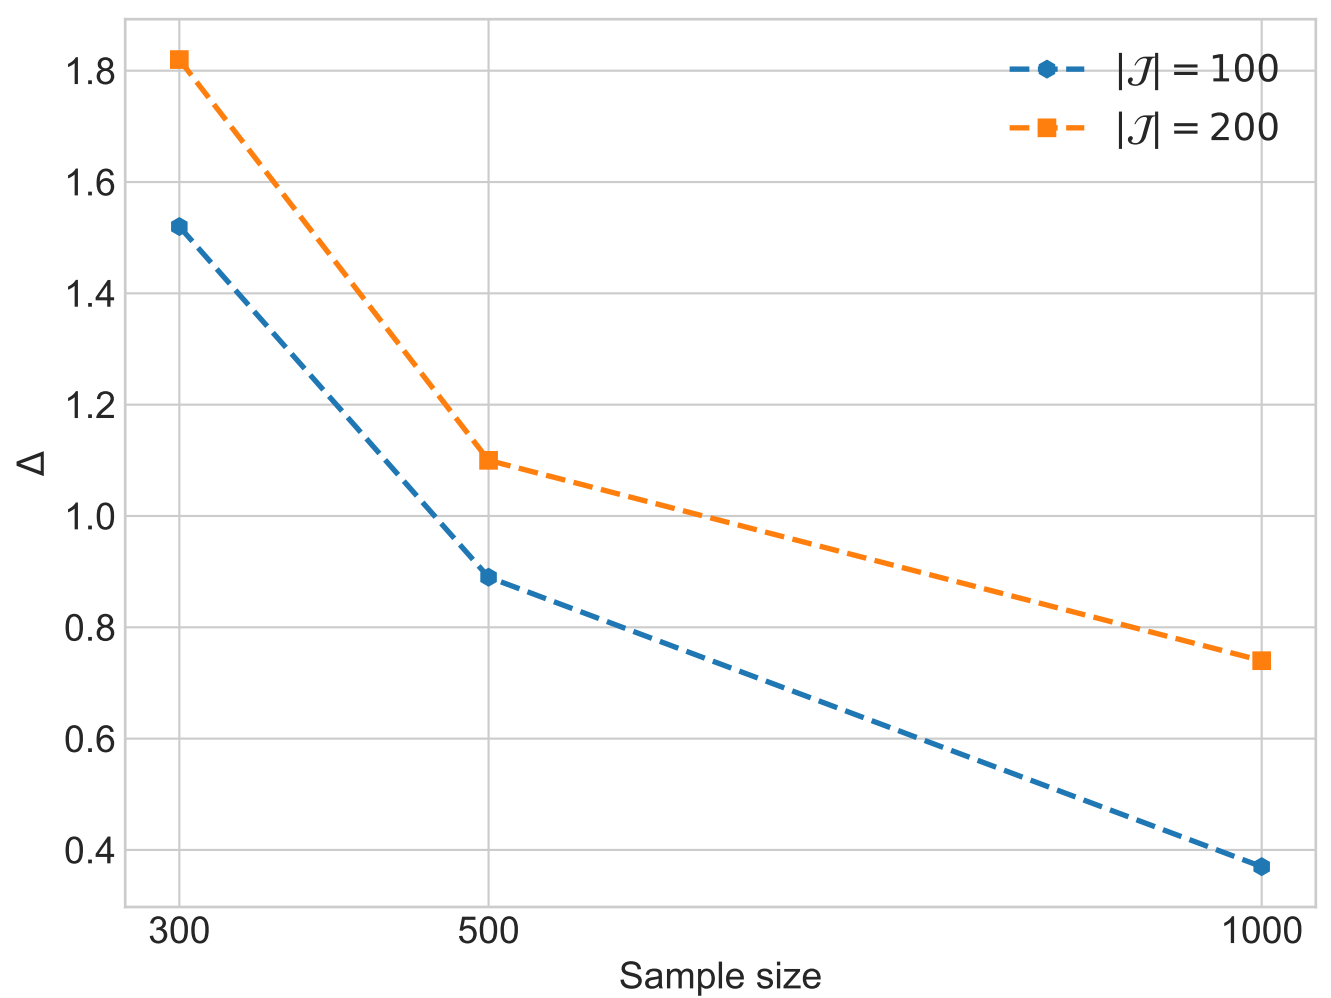

Supplement: ijoc.2024.0694.cd.zip [file app3-D3.pdf › 2024.0694-main/results/app3-D3.pdf]

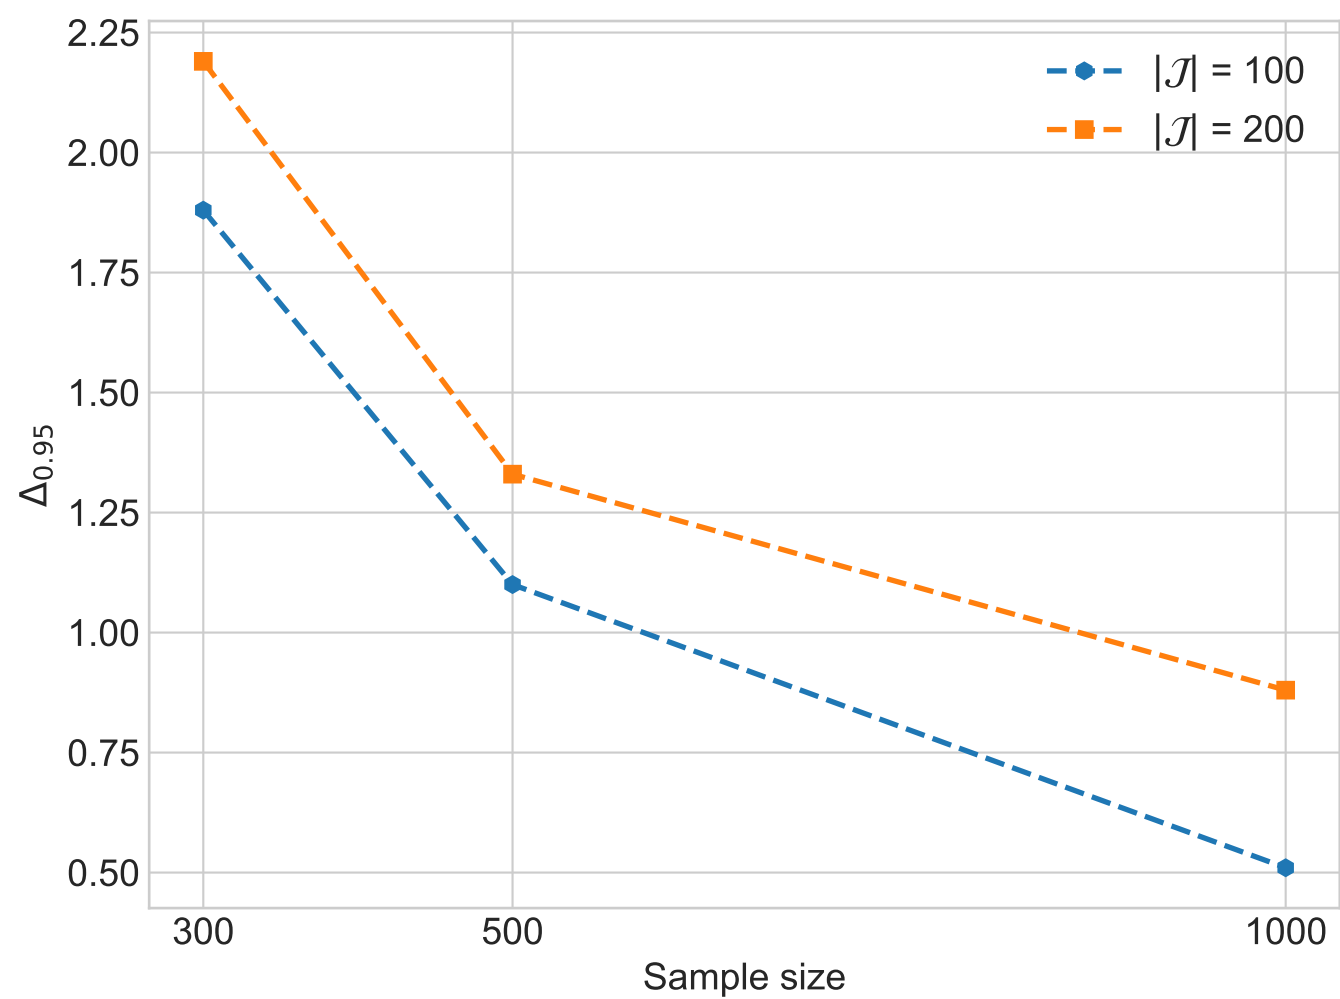

Supplement: ijoc.2024.0694.cd.zip [file app3-Da3.pdf › 2024.0694-main/results/app3-Da3.pdf]
